# Supplementary material for: Dengue Incidence Trends and Its Burden in Major Endemic Regions from 1990 to 2019
Source: MDPI journal article supplement (doi:10.3390/tropicalmed7080180), 2022-08-12
Supplement: s1 [file s1]

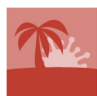

## Supplementary Materials: Dengue Incidence Trends and Its Burden in Major Endemic Regions from 1990 to 2019

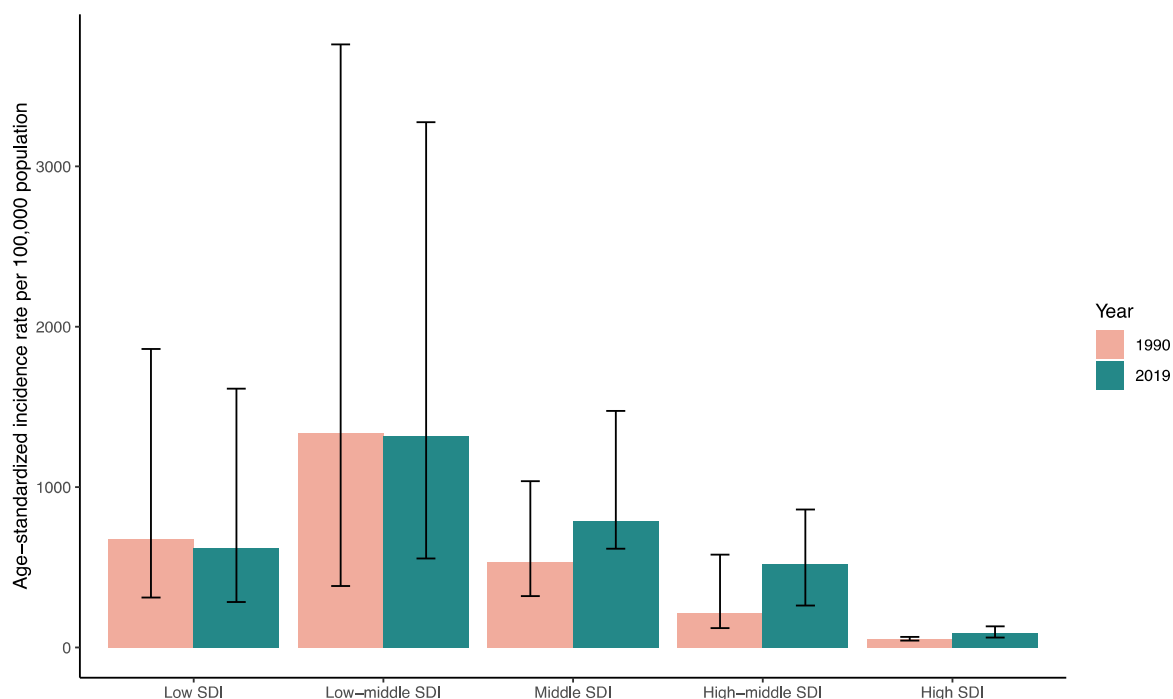

(a)

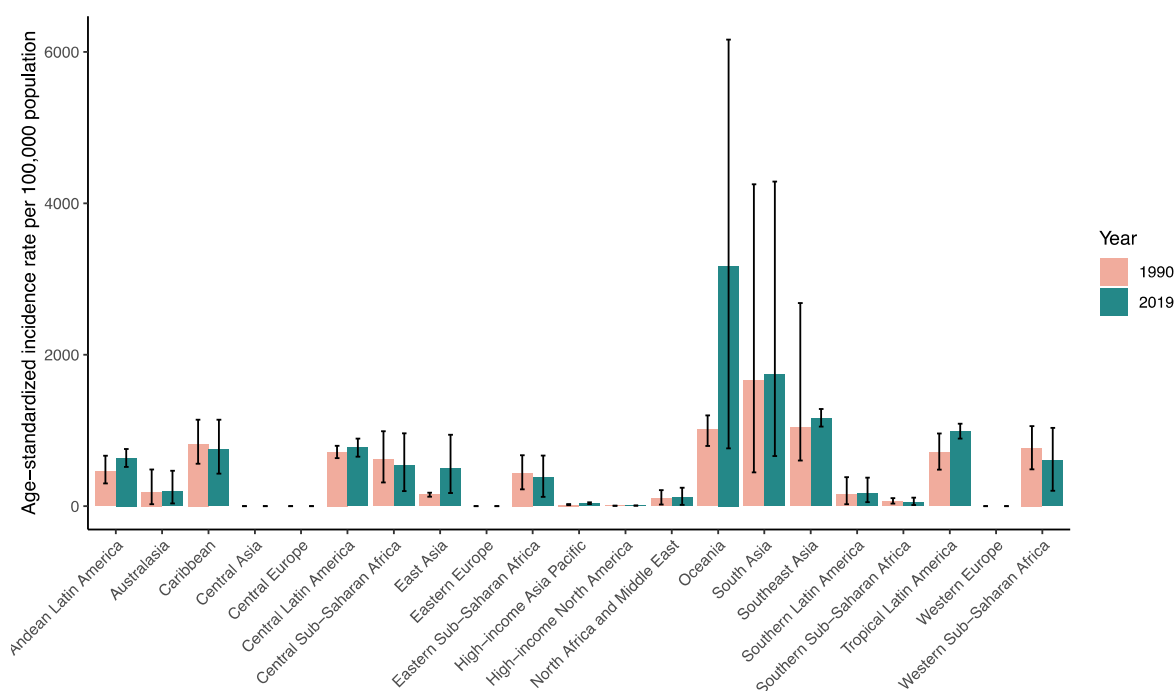

(b)

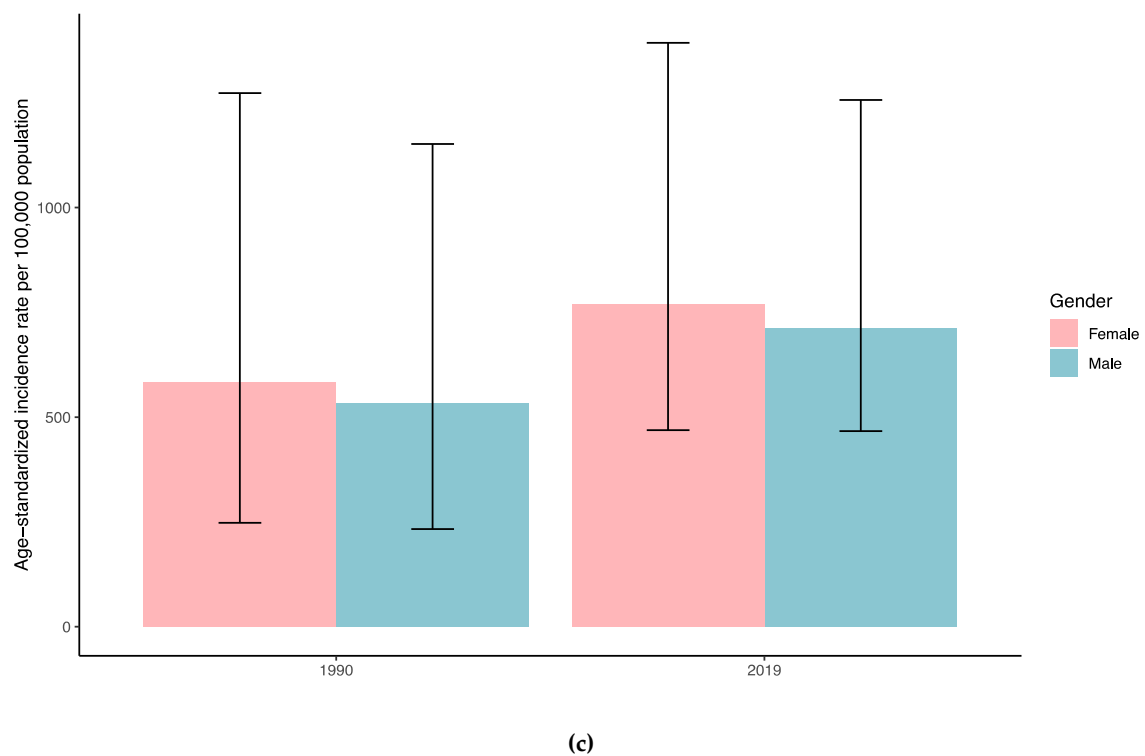

**Figure S1.** (a). Age-standardized incidence rate per 100,000 population with dengue of 5 SDI areas in 1990 and 2019; (b). Age-standardized incidence rate per 100,000 population with dengue of 21 regions in 1990 and 2019; (c). Age-standardized incidence rate per 100,000 population with dengue of different genders in 1990 and 2019.

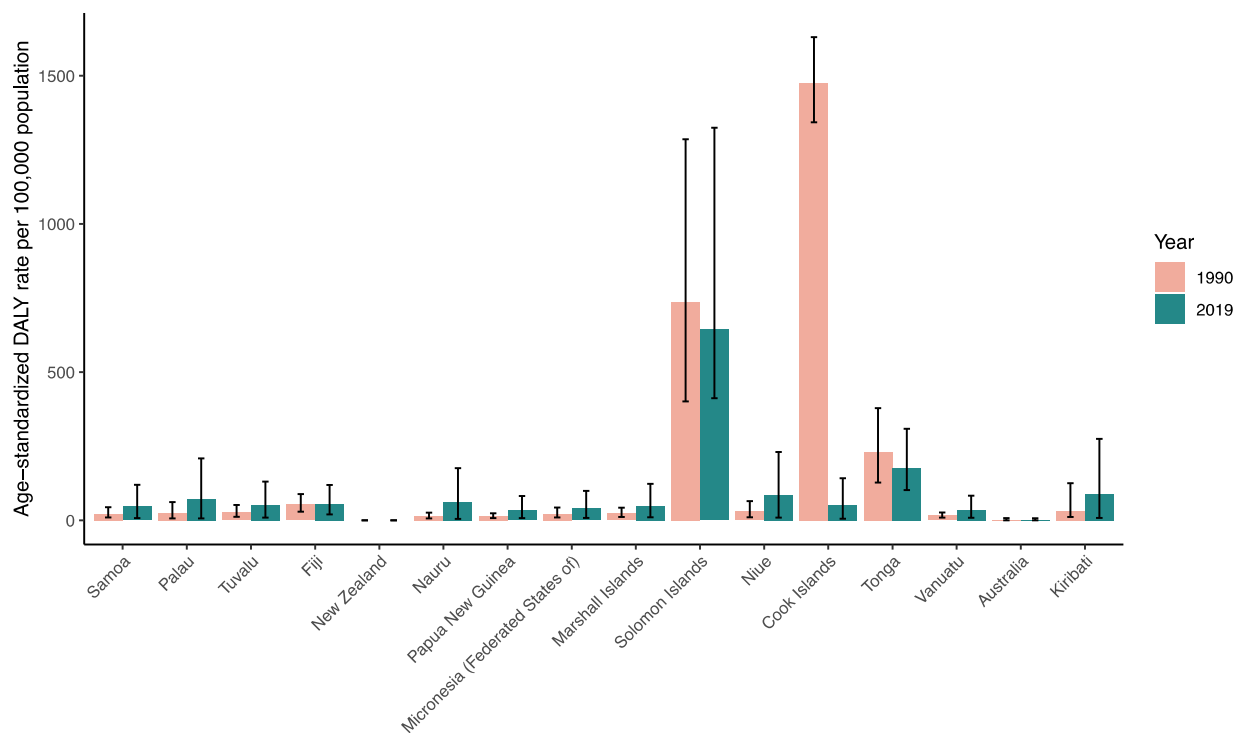

**Figure S2.** Age-standardized DALY rate per 100,000 population with dengue of Oceania countries in 1990 and 2019.

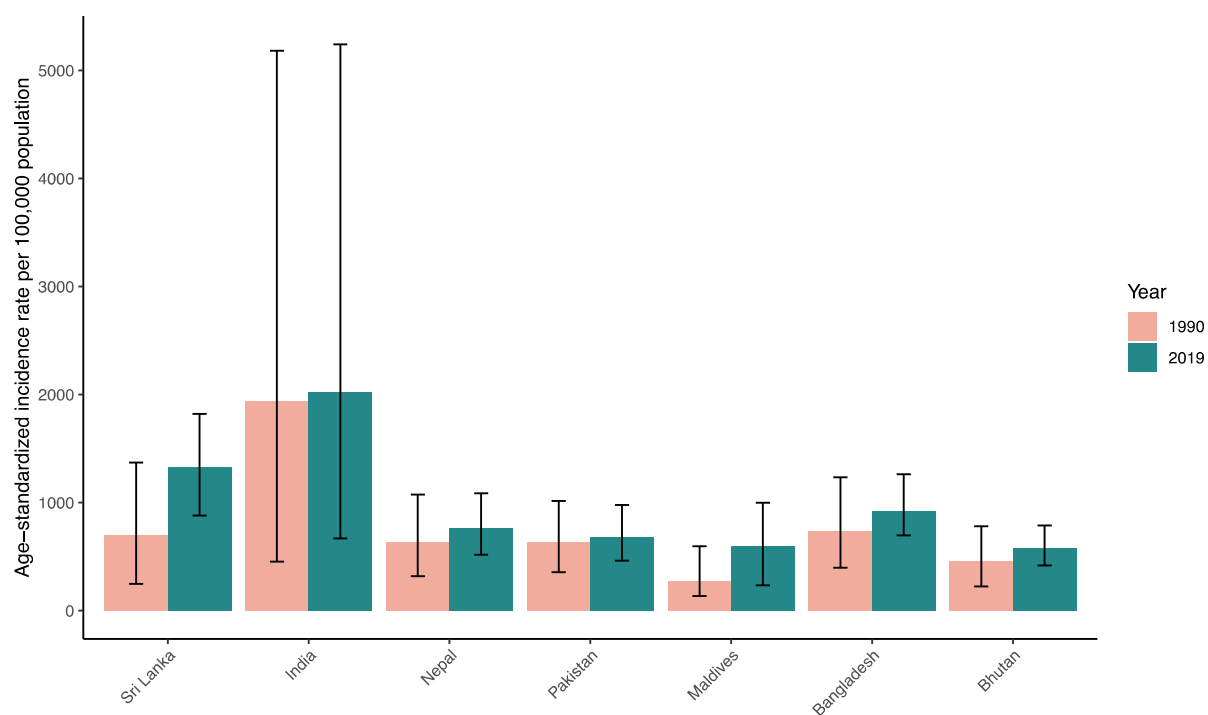

**Figure S3.** Age-standardized incidence rate per 100,000 population with dengue of South Asia countries in 1990 and 2019.

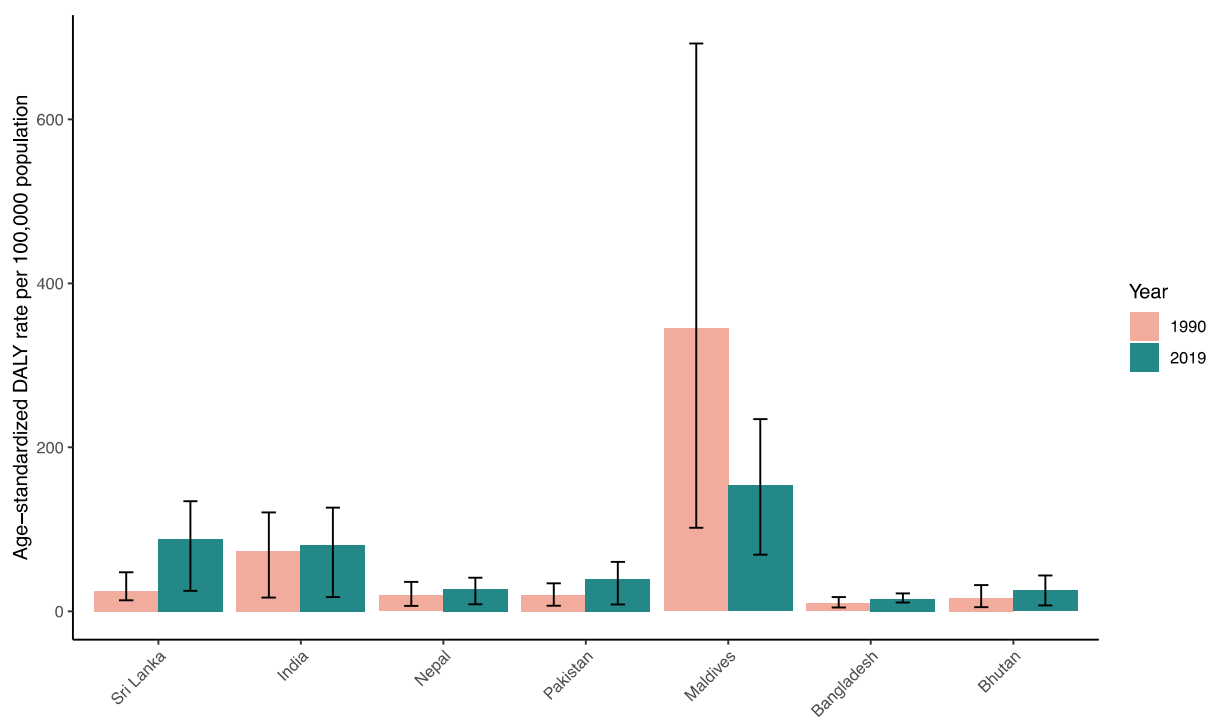

**Figure S4.** Age-standardized DALY rate per 100,000 population with dengue of South Asia countries in 1990 and 2019.

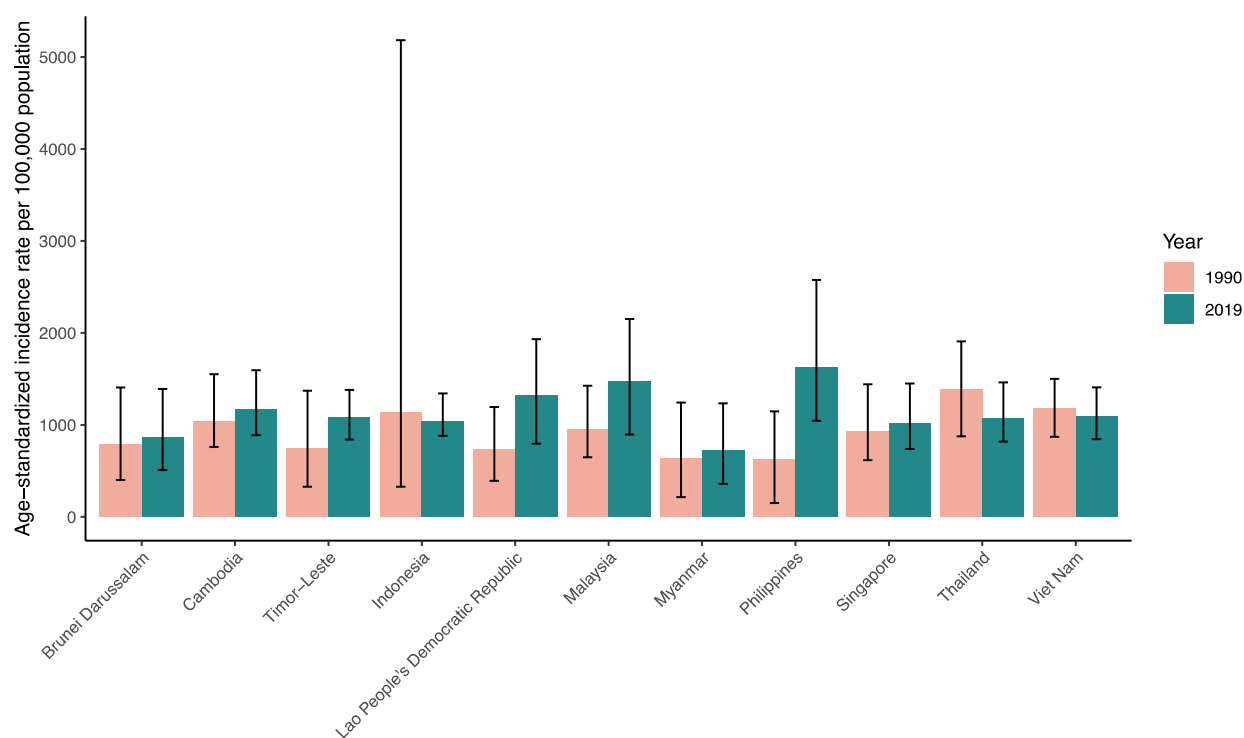

**Figure S5.** Age-standardized incidence rate per 100,000 population with dengue of Southeast Asia countries in 1990 and 2019.

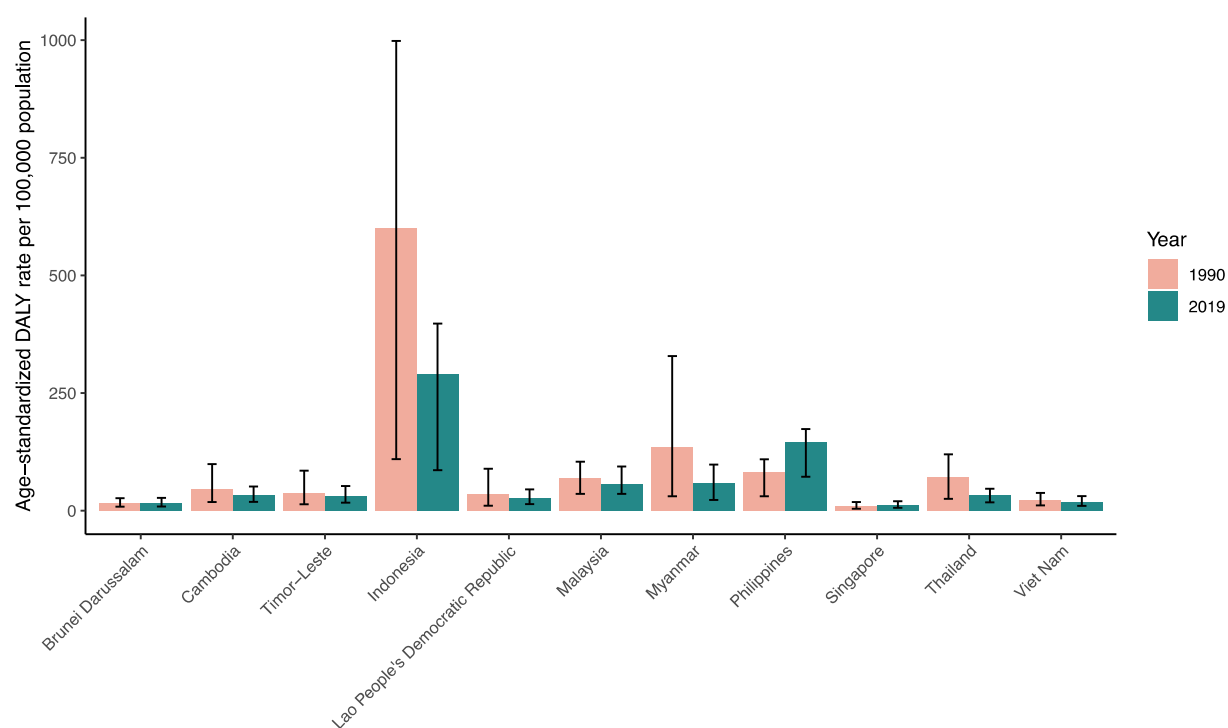

**Figure S6.** Age-standardized DALY rate per 100,000 population with dengue of Southeast Asia countries in 1990 and 2019.

**Table S1.** The Incident cases and age-standardized incidence of Dengue in 1990 and 2019 in Oceania.

| Characteristics  | 1990                          |                             | 2019                           |                              |
|------------------|-------------------------------|-----------------------------|--------------------------------|------------------------------|
|                  | Incident Cases                | ASR per 100,000             | Incident Cases                 | ASR per 100,000              |
|                  | No. X 10 <sup>5</sup> (95%UI) | No. (95%UI)                 | No. X 10 <sup>5</sup> (95%UI)  | No. (95%UI)                  |
| Australia        | 37610.8<br>(5340.2–97520.6)   | 223.62<br>(30.81–581.71)    | 55235<br>(10394.6–136155.6)    | 223.32<br>(40.49–552.18)     |
| New Zealand      | 0(0–0)                        | 0(0–0)                      | 0(0–0)                         | 0(0–0)                       |
| Palau            | 405<br>(129.5–776.3)          | 2510.37<br>(842.14–4696.64) | 1305<br>(155.3–2734.3)         | 7536.07<br>(888.63–15922.13) |
| Micronesia       | 1701.3<br>(724.3–3116.7)      | 1497.1<br>(686.55–2615.09)  | 3771<br>(700.8–7895)           | 3648.91<br>(685.84–7429.88)  |
| Marshall Islands | 796.5<br>(399.2–1322.3)       | 1642.68<br>(857.84–2568.06) | 2520.1<br>(499–5261.3)         | 4441<br>(881.71–9121.69)     |
| Nauru            | 52<br>(22.4–84)               | 491.97<br>(219.78–767.97)   | 705.9<br>(24.4–1632.8)         | 5703.39<br>(231.39–13013.35) |
| Papua New Guinea | 24695<br>(12001–41839.9)      | 628.76<br>(347.3–1021.92)   | 288036.9<br>(69069.5–590411.7) | 2943.6<br>(705.36–5895.13)   |
| Solomon Islands  | 3723.8<br>(2594.8–5576.1)     | 1047.85<br>(726.51–1609.95) | 25591.1<br>(5633.4–53449.7)    | 3797.55<br>(860.73–7657.75)  |
| Vanuatu          | 1929.9<br>(1290.4–2722.2)     | 1276.67<br>(849.53–1756.58) | 9165.1<br>(2467.6–17992.3)     | 3289.71<br>(833.21–6372.83)  |
| Tuvalu           | 140.6<br>(74.8–232.7)         | 1506.33<br>(811.8–2473.9)   | 561.3<br>(94.3–1171)           | 4677.83<br>(797.77–9631.44)  |
| Fiji             | 15099.2<br>(6499–26233.3)     | 2158.6<br>(852.49–3676.16)  | 35659.7<br>(7920.4–71836.2)    | 3983.59<br>(878.61–7962.74)  |
| Samoa            | 3069.4<br>(1289–5639.3)       | 1736.76<br>(770.67–3016.8)  | 9819.4<br>(1700.3–20776.7)     | 4444.48<br>(792.06–9150.63)  |
| Kiribati         | 1366.1<br>(693.1–2223)        | 1809.97<br>(939.55–2860.67) | 9714.6<br>(1115.8–21058.1)     | 8050.59<br>(944.28–17167.95) |
| Tonga            | 3957.2<br>(807.5–8287.6)      | 3905.13<br>(821.13–8019.19) | 3284.2<br>(846.1–6452.8)       | 3312.81<br>(819.65–6477.92)  |
| Cook Islands     | 315.1<br>(114.3–594.5)        | 1591.25<br>(598.52–2946.57) | 944.8<br>(107.8–2001.7)        | 5246.76<br>(601.99–11243.99) |
| Niue             | 63.9<br>(21.7–117.5)          | 2707.12<br>(920.78–4924.34) | 146.5<br>(16–306.7)            | 8749.54<br>(958.61–18365.54) |

**Table S2.** The DALY and age-standardized DALY rate of Dengue in 1990 and 2019 in Oceania.

| Characteristics  | 1990                      |                                   | 2019                      |                                   |
|------------------|---------------------------|-----------------------------------|---------------------------|-----------------------------------|
|                  | DALY (95% UI)             | Per 100,000 Person-Years (95% UI) | DALY (95% UI)             | Per 100,000 Person-Years (95% UI) |
|                  |                           |                                   |                           |                                   |
| Australia        | 380.49<br>(33.55–1232.99) | 2.26<br>(0.19–7.36)               | 556.58<br>(70.46–1690.31) | 2.26<br>(0.27–6.98)               |
| New Zealand      | 0 (0–0)                   | 0 (0–0)                           | 0 (0–0)                   | 0 (0–0)                           |
| Palau            | 4.02<br>(0.96–10.00)      | 25.13<br>(6.59–61.35)             | 12.54<br>(1.15–35.79)     | 72.87<br>(6.56–208.75)            |
| Micronesia       | 24.72<br>(10.39–49.50)    | 22.27<br>(9.79–43.06)             | 41.53<br>(8.25–104.99)    | 40.12<br>(8.26–99.87)             |
| Marshall Islands | 10.91<br>(5.04–20.97)     | 23.07<br>(11.16–42.52)            | 27.81<br>(5.77–70.34)     | 48.81<br>(10.31–123.34)           |
| Nauru            | 1.49<br>(0.69–3.00)       | 13.42<br>(6.57–26.06)             | 7.59<br>(0.55–21.89)      | 61.70<br>(5.16–175.88)            |

|                  |                              |                              |                              |                            |
|------------------|------------------------------|------------------------------|------------------------------|----------------------------|
| Papua New Guinea | 629.47<br>(305.77–1202.01)   | 13.84<br>(7.44–24.10)        | 3454.94<br>(817.45–8478.14)  | 34.01<br>(8.02–82.29)      |
| Solomon Islands  | 3048.62<br>(1450.63–5258.09) | 736.51<br>(400.88–1285.77)   | 4586.11<br>(2922.71–8629.23) | 643.73<br>(412.16–1325.22) |
| Vanuatu          | 25.03 (14.06–40.77)          | 16.35 (9.17–26.75)           | 99.04 (26.69–233.30)         | 34.91 (8.99–83.06)         |
| Tuvalu           | 2.59 (1.12–5.24)             | 26.36 (11.93–51.76)          | 6.08 (1.11–15.61)            | 50.66 (9.42–130.70)        |
| Fiji             | 397.77<br>(221.02–663.89)    | 53.17<br>(28.98–88.27)       | 490.89<br>(175.63–1070.99)   | 54.93<br>(20.00–119.55)    |
| Samoa            | 39.12<br>(15.91–78.43)       | 22.49<br>(9.61–44.11)        | 103.03<br>(16.62–265.47)     | 46.63<br>(8.01–119.97)     |
| Kiribati         | 24.56<br>(8.88–100.89)       | 31.71<br>(11.49–125.14)      | 106.68<br>(10.15–330.60)     | 88.04<br>(8.52–275.07)     |
| Tonga            | 228.29<br>(121.58–373.13)    | 231.16<br>(127.71–378.25)    | 180.81<br>(102.78–311.24)    | 178.12<br>(101.98–308.74)  |
| Cook Islands     | 224.49<br>(204.28–247.92)    | 1475.96<br>(1343.00–1630.60) | 9.15<br>(0.96–24.94)         | 51.22<br>(5.39–141.93)     |
| Niue             | 0.72 (0.24–1.54)             | 30.57 (10.21–64.93)          | 1.44 (0.15–3.81)             | 86.70 (9.32–230.66)        |

**Table S3.** The Incident cases and age-standardized incidence of Dengue in 1990 and 2019 in South Asia.

| Characteristics | 1990                                    |                             | 2019                                    |                             |
|-----------------|-----------------------------------------|-----------------------------|-----------------------------------------|-----------------------------|
|                 | Incident Cases                          | ASR per 100,000 No. (95%UI) | Incident Cases                          | ASR per 100,000 No. (95%UI) |
| Sri Lanka       | 120407.66<br>(42029.91–236749.71)       | 696.81<br>(247.67–1370.52)  | 285258.85<br>(190816.66–386191.67)      | 1329.64<br>(879.91–1821.17) |
| India           | 16443576.41<br>(3726595.02–44042934.66) | 1943.39<br>(453.69–5181.79) | 27991970.66<br>(9433373.98–72604214.80) | 2020.83<br>(667.80–5240.95) |
| Nepal           | 122776.33<br>(56786.79–209781.88)       | 639.36<br>(318.77–1075.22)  | 234986.17<br>(159286.95–331568.04)      | 764.25<br>(517.47–1085.56)  |
| Pakistan        | 702318.47<br>(370915.27–1145151.36)     | 632.98<br>(356.23–1014.29)  | 1532033.59<br>(1018914.43–2188538.23)   | 684.84<br>(463.16–977.69)   |
| Maldives        | 612.89<br>(284.03–1331.01)              | 275.46<br>(135.82–596.06)   | 3025.12<br>(1129.22–5315.17)            | 593.17<br>(233.42–997.96)   |
| Bangladesh      | 794158.01<br>(404701.24–1358937.09)     | 734.57<br>(396.90–1235.26)  | 1481551.66<br>(1118976.10–2011114.36)   | 922.89<br>(697.19–1262.38)  |
| Bhutan          | 2792.11<br>(1269.32–4819.88)            | 457.70<br>(223.91–781.44)   | 4413.27<br>(3154.16–5928.35)            | 580.95<br>(417.56–789.63)   |

**Table S4.** The DALY and age-standardized DALY rate of Dengue in 1990 and 2019 in South Asia.

| Characteristics | 1990          |                                   | 2019          |                                   |
|-----------------|---------------|-----------------------------------|---------------|-----------------------------------|
|                 | DALY (95% UI) | Per 100,000 person-years (95% UI) | DALY (95% UI) | Per 100,000 person-years (95% UI) |
| Sri Lanka       | 4341.66       | 19.31                             | 7746.26       | 27.17                             |

|            |                                     |                           |                                      |                          |
|------------|-------------------------------------|---------------------------|--------------------------------------|--------------------------|
|            | (1296.94–9090.58)                   | (6.66–35.96)              | (2516.77–11963.86)                   | (8.54–40.92)             |
| India      | 109.59<br>(27.28–244.54)            | 16.24<br>(4.94–32.10)     | 175.41<br>(51.99–306.55)             | 25.36<br>(7.24–43.66)    |
| Nepal      | 656354.76<br>(142644.92–1096380.18) | 73.33<br>(16.80–120.49)   | 1066687.41<br>(230921.41–1686113.73) | 80.63<br>(17.47–126.48)  |
| Pakistan   | 26485.06<br>(7732.77–50064.60)      | 20.25<br>(6.78–34.14)     | 91032.36<br>(18826.64–145056.16)     | 39.67<br>(8.44–60.32)    |
| Maldives   | 10274.71<br>(4820.55–19557.21)      | 9.35<br>(4.56–17.34)      | 23680.64<br>(16359.38–34198.24)      | 15.29<br>(10.70–21.82)   |
| Bangladesh | 4420.07<br>(2429.18–8397.55)        | 24.46<br>(13.48–47.47)    | 18138.32<br>(5145.68–27420.50)       | 87.78<br>(24.89–134.18)  |
| Bhutan     | 1103.45<br>(273.02–2388.75)         | 345.10<br>(101.88–692.54) | 736.40<br>(330.77–1141.39)           | 153.32<br>(69.16–234.50) |

**Table S5.** The Incident cases and age-standardized incidence of Dengue in 1990 and 2019 in Southeast Asia.

| Characteristics                  | 1990                             |                                | 2019                               |                                |
|----------------------------------|----------------------------------|--------------------------------|------------------------------------|--------------------------------|
|                                  | Incident Cases<br>No. (95%UI)    | ASR per 100,000<br>No. (95%UI) | Incident Cases<br>No. (95%UI)      | ASR per 100,000<br>No. (95%UI) |
| Brunei Darussalam                | 2019.8<br>(982.6–3608.1)         | 792.25<br>(401.83–1405.85)     | 3828.6<br>(2402.9–5941)            | 861.24<br>(507.74–1391.93)     |
| Cambodia                         | 107133.5<br>(73860.5–160987.5)   | 1043.82<br>(758.14–1551.06)    | 194685.4<br>(147095.6–263078.9)    | 1171.37<br>(887.8–1594.67)     |
| Timor-Leste                      | 5738.6<br>(2346.1–10647)         | 748.17<br>(327.61–1371.13)     | 14697.3<br>(11236.2–19087.7)       | 1081.21<br>(840.7–1380.49)     |
| Indonesia                        | 2173180.7<br>(618623–9995522.3)  | 1143.41<br>(328.46–5182.99)    | 2655179.6<br>(2243011.3–3450631.1) | 1037.02<br>(881.07–1342.97)    |
| Lao People's Democratic Republic | 28388.2<br>(12698.2–49709.1)     | 728.86<br>(392.69–1193.72)     | 94474.4<br>(56762.8–140588.7)      | 1319.73<br>(796.44–193.54)     |
| Malaysia                         | 167407.3<br>(111590.5–252175.5)  | 947.42<br>(648.65–1425.78)     | 457683.9<br>(277434.7–675960.6)    | 1468.76<br>(894.29–2150.69)    |
| Myanmar                          | 263713.3<br>(87015.5–512501.4)   | 639.4<br>(215.06–1243.97)      | 392553.7<br>(192026.1–669275.6)    | 724.6<br>(358.65–1233.58)      |
| Philippines                      | 392056.6<br>(79369.6–730089.9)   | 629.16<br>(148.95–1147.73)     | 1832711.7<br>(1165380.1–2979228.3) | 1619.95<br>(1044.81–2574.39)   |
| Singapore                        | 28728.5<br>(19511.8–43441.2)     | 928.3<br>(615.9–1441.33)       | 58228.5<br>(43929.1–79529.3)       | 1013.87<br>(738.37–1448.53)    |
| Thailand                         | 798026.4<br>(499380.4–1113112.3) | 1389.11<br>(875.56–1906.71)    | 699667.8<br>(508746.2–1009396.9)   | 1071.76<br>(817.13–1461)       |
| Vietnam                          | 812956.1<br>(598469.7–1051770.6) | 1179.1<br>(870.85–1500.71)     | 1038967.7<br>(812230.9–1333875)    | 1090.57<br>(843.72–1408.31)    |

**Table S6.** The DALY and age-standardized DALY rate of Dengue in 1990 and 2019 in Southeast Asia.

| Characteristics                  | 1990                                 |                                         | 2019                               |                                         |
|----------------------------------|--------------------------------------|-----------------------------------------|------------------------------------|-----------------------------------------|
|                                  | DALY<br>(95% UI)                     | Per 100,000<br>person-years (95%<br>UI) | DALY<br>(95% UI)                   | Per 100,000<br>person-years (95%<br>UI) |
| Brunei Darus-salam               | 37.73<br>(19.79–65.03)               | 15.75<br>(8.52–26.41)                   | 74.14<br>(40.77–119.53)            | 16.65<br>(8.87–27.45)                   |
| Cambodia                         | 6577.63<br>(2234.63–15435.98)        | 44.97<br>(18.30–99.05)                  | 5484.80<br>(3214.38–8972.49)       | 31.91<br>(18.90–51.33)                  |
| Timor-Leste                      | 431.01<br>(123.22–1098.54)           | 37.50<br>(13.45–85.03)                  | 472.88<br>(250.76–837.11)          | 30.82<br>(17.16–52.37)                  |
| Indonesia                        | 1322558.24<br>(227422.46–2223416.07) | 600.02<br>(109.48–998.23)               | 647505.72<br>(205032.78–879508.99) | 290.10<br>(85.96–397.48)                |
| Lao People's Democratic Republic | 1994.24<br>(458.05–5580.21)          | 35.07<br>(10.48–88.97)                  | 1965.84<br>(1031.27–3403.61)       | 26.20<br>(13.91–45.23)                  |
| Malaysia                         | 13363.08<br>(7069.55–20556.98)       | 70.32<br>(35.78–104.04)                 | 17625.25<br>(11187.02–29021.27)    | 55.95<br>(35.96–93.76)                  |
| Myanmar                          | 73348.89<br>(15076.86–187701.77)     | 134.12<br>(30.52–328.49)                | 30012.74<br>(11879.34–50279.95)    | 57.88<br>(22.55–97.73)                  |
| Philippines                      | 69048.47<br>(22401.86–92265.10)      | 82.73<br>(30.62–109.37)                 | 177024.63<br>(86148.37–212202.78)  | 145.51<br>(72.15–173.75)                |
| Singapore                        | 283.62<br>(131.11–558.35)            | 9.13 (4.11–18.64)                       | 684.39<br>(385.23–1143.49)         | 11.45 (6.22–20.03)                      |
| Thailand                         | 41831.99<br>(14808.59–68997.52)      | 72.39<br>(25.33–119.45)                 | 18978.36<br>(10420.42–26957.35)    | 33.75<br>(17.72–46.73)                  |
| Vietnam                          | 16311.85<br>(8309.75–29605.24)       | 21.50<br>(11.15–37.83)                  | 16786.91<br>(9661.52–27316.66)     | 18.70<br>(10.40–30.98)                  |

**Table S7.** The age distribution of dengue incidence and DALY in 2019 of Oceania, South Asia and Southeast Asia (Per 100 000).

| Age groups    | Oceania                                        |                               | South Asia                                     |                               | Southeast Asia                                 |                               |
|---------------|------------------------------------------------|-------------------------------|------------------------------------------------|-------------------------------|------------------------------------------------|-------------------------------|
|               | Age-standardized incidence rate<br>No. (95%UI) | DALY<br>person-years (95% UI) | Age-standardized incidence rate<br>No. (95%UI) | DALY<br>person-years (95% UI) | Age-standardized incidence rate<br>No. (95%UI) | DALY<br>person-years (95% UI) |
| Under 5 years | 1622.76<br>(540.73–4000.98)                    | 134.77<br>(64.16–222.86)      | 1033.22<br>(253.93–2720.77)                    | 156.11<br>(21.36–173.13)      | 703.54<br>(479.67–875.47)                      | 726.63<br>(176.49–1061.41)    |
| 5–14 years    | 3916.97                                        | 60.19                         | 1927.67                                        | 58.05                         | 1447.19                                        | 165.86                        |



---

|                |                   |                |                   |                |                   |                |
|----------------|-------------------|----------------|-------------------|----------------|-------------------|----------------|
|                | (930.97–8969.21)  | (22.05–128.49) | (642.01–4783.93)  | (14.36–102.97) | (1263.18–1823.01) | (66.35–209.75) |
| <b>15–49</b>   | 3241.41           | 66.36          | 1746.37           | 54.99          | 1162.85           | 72.86          |
| <b>years</b>   | (746.59–6719.03 ) | (29.66–148.18) | (727.36–4170.48 ) | (12.59–86.55)  | (1013.91–1370.47) | (36.42–96.06)  |
| <b>50–69</b>   | 2694.36           | 48.84          | 1697.99           | 72.05          | 935.82            | 59.38          |
| <b>years</b>   | (702.33–5665.02)  | (21.23–102.92) | (581.51–4209.18)  | (13.62–106.53) | (757.16–1124.07)  | (22.06–76.73)  |
| <b>Over 70</b> | 4610.21           | 66.78          | 2284.13           | 137.06         | 1356.32           | 66.79          |
| <b>years</b>   | (879.78–10138.58) | (23.62–156.11) | (683.85–5983.69)  | (38.12–193.18) | (1222.49–1538.18) | (33.89–83.03)  |

---
